# Supplementary material
Source: PubMed Central journal article supplement (PMC2662650)
Supplement: blood-2008-07-163212_1.pdf [file blood-2008-07-163212_1.pdf]

| Factors                                                                                                                                                                                        | Relative Risk | 95% CI    | P       |
|------------------------------------------------------------------------------------------------------------------------------------------------------------------------------------------------|---------------|-----------|---------|
| <b>AML</b>                                                                                                                                                                                     |               |           |         |
| *URD vs. <sup>a</sup> Sib (no acute GVHD)                                                                                                                                                      | 2.76          | 2.05-3.72 | <0.0001 |
| *URD vs. <sup>a</sup> Sib (acute GVHD present)                                                                                                                                                 | 1.19          | 0.85-1.66 | 0.32    |
| Chronic GVHD                                                                                                                                                                                   | 1.49          | 1.14-1.95 | 0.004   |
| Interaction present between donor source and acute GVHD. Model also adjusted for disease stage, donor age, GVHD prophylaxis, karnofsky score and stratified by graft type and gender mismatch. |               |           |         |
| <b>ALL</b>                                                                                                                                                                                     |               |           |         |
| URD vs. <sup>a</sup> Sib                                                                                                                                                                       | 1.19          | 0.88-1.60 | 0.25    |
| cGVHD                                                                                                                                                                                          | 1.79          | 1.21-2.63 | 0.0033  |
| <b>Acute GVHD (interaction with disease stage and patient age)</b>                                                                                                                             |               |           |         |
| <b>No acute GVHD</b>                                                                                                                                                                           |               |           |         |
| <sup>b</sup> Disease Stage                                                                                                                                                                     |               |           |         |
| <sup>a</sup> Early                                                                                                                                                                             | 1.0           |           |         |
| Intermediate                                                                                                                                                                                   | 2.11          | 1.34-3.32 | 0.0014  |
| Advanced                                                                                                                                                                                       | 3.12          | 2.00-4.86 | <0.0001 |
| Patient age                                                                                                                                                                                    |               |           |         |
| <sup>a</sup> 18-30                                                                                                                                                                             | 1.0           |           |         |
| 31-40                                                                                                                                                                                          | 2.54          | 1.59-4.05 | <0.0001 |
| 41-50                                                                                                                                                                                          | 1.93          | 1.14-3.26 | 0.014   |
| 51-60                                                                                                                                                                                          | 2.43          | 1.31-4.50 | 0.0048  |
| <b>Acute GVHD Present</b>                                                                                                                                                                      |               |           |         |
| <sup>b</sup> Disease stage                                                                                                                                                                     |               |           |         |
| <sup>a</sup> Early                                                                                                                                                                             | 1.0           |           |         |
| Intermediate                                                                                                                                                                                   | 0.98          | 0.61-1.56 | 0.92    |
| Advanced                                                                                                                                                                                       | 1.11          | 0.67-1.84 | 0.69    |
| Patient age                                                                                                                                                                                    |               |           |         |
| <sup>a</sup> 18-30                                                                                                                                                                             | 1.0           |           |         |
| 31-40                                                                                                                                                                                          | 0.78          | 0.47-1.30 | 0.34    |
| 41-50                                                                                                                                                                                          | 1.62          | 0.99-2.65 | 0.057   |
| 51-60                                                                                                                                                                                          | 1.91          | 0.95-3.84 | 0.069   |
| Interaction present between aGVHD with patient age and disease stage. Model stratified by graft type and gender mismatch.                                                                      |               |           |         |
| <b>CML</b>                                                                                                                                                                                     |               |           |         |
| URD vs. Sib                                                                                                                                                                                    | 1.02          | 0.83-1.25 | 0.85    |
| Acute GVHD                                                                                                                                                                                     | 2.59          | 2.16-3.11 | <0.0001 |
| Chronic GVHD                                                                                                                                                                                   | 1.61          | 1.28-2.04 | <0.0001 |
| Model also adjusted for patient age, time from diagnosis to transplant and disease stage and stratified by graft type and gender mismatch.                                                     |               |           |         |

Abbreviations: URD = unrelated donor; Sib = HLA-identical sibling; AML = acute myeloid leukemia; ALL = acute lymphoid leukemia; CML = chronic myeloid leukemia, GVHD = graft-versus-host disease; CI = confidence interval. <sup>a</sup> Reference group; <sup>b</sup> Disease status is categorized as follows: Early - includes AML and ALL in CR1 or CML in first chronic phase; Intermediate - includes AML and ALL in  $\geq$  CR2 or CML in AP or  $\geq$  second chronic phase. Advanced - includes AML and ALL with relapse or primary induction failure or CML in blast crisis.
